# Supplementary material for: Novel “turn-on” fluorescent chemodosimeters based on thioxanthen-9-thione for the selective detection of mercuric ions in aqueous media
Source: Royal Society of Chemistry journal article supplement (doi:10.1039/c2ra00048b), 2012-01-01
Supplement: c2ra00048b.pdf [file c2ra00048b.pdf]

# Electronic Supplementary Information (ESI)

## Novel “turn-on” fluorescent chemodosimeters based on thioxanthen-9-thione for the selective detection of mercuric ion in aqueous media

Li Ding, Qi Zou, Yi Qu and Jianhua Su\*

Key Laboratory for Advanced Materials and Institute of Fine Chemicals, East China University of Science & Technology, Meilong Road 130, Shanghai 200237, PR China

\* Corresponding author. Tel.: +86 21 64252288; fax.: +86 21 64252288.

E-mail address: [bbsjh@ecust.edu.cn](mailto:bbsjh@ecust.edu.cn) (Jianhua Su)

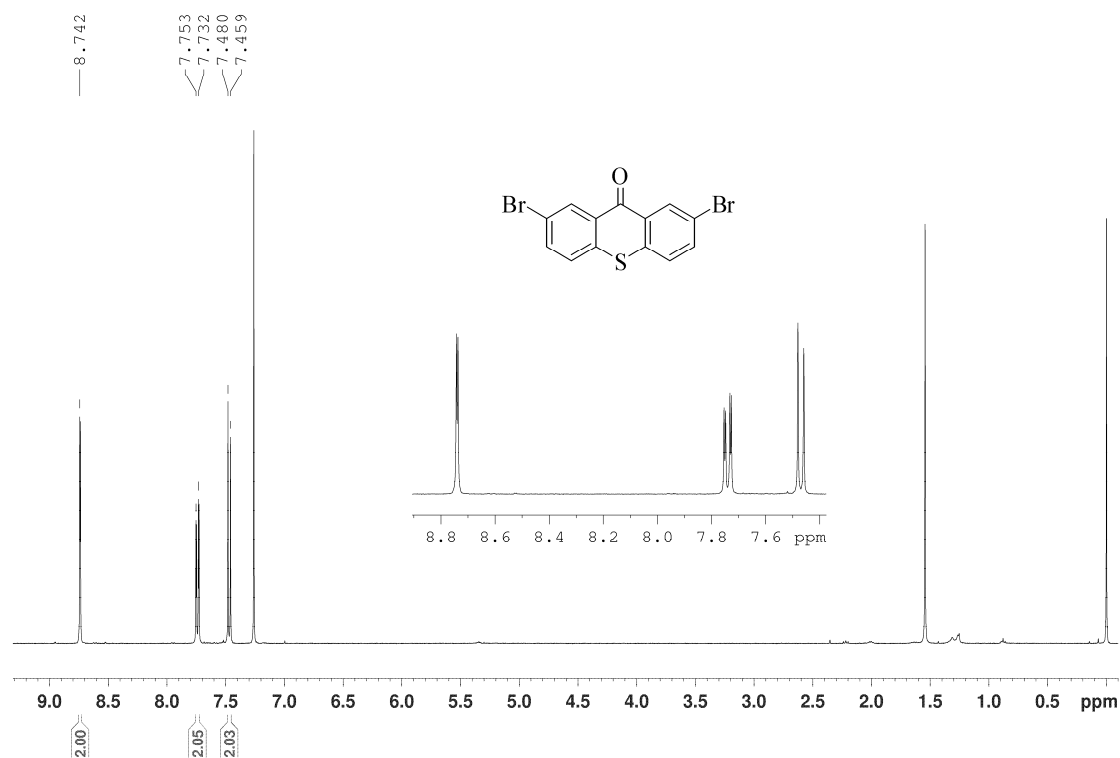

**Figure S1.** <sup>1</sup>H NMR (400 MHz, CDCl<sub>3</sub>) spectrum of compound **DB-TXO**.

Monoisotopic Mass, Odd and Even Electron Ions  
15 formula(e) evaluated with 1 results within limits (up to 1 best isotopic matches for each mass)  
Elements Used:  
C: 0-15 H: 0-10 O: 0-1 S: 0-2 Br: 0-2

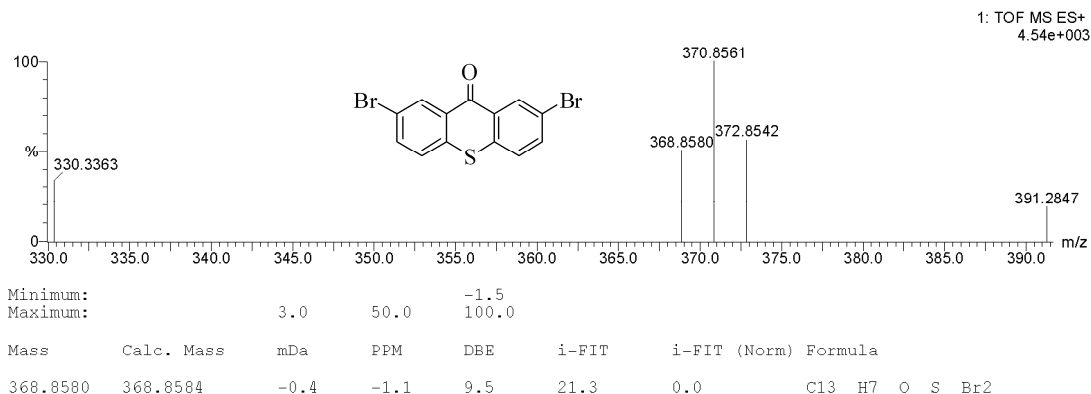

**Figure S2.** ESI-MS spectrum of compound **DB-TXO**.

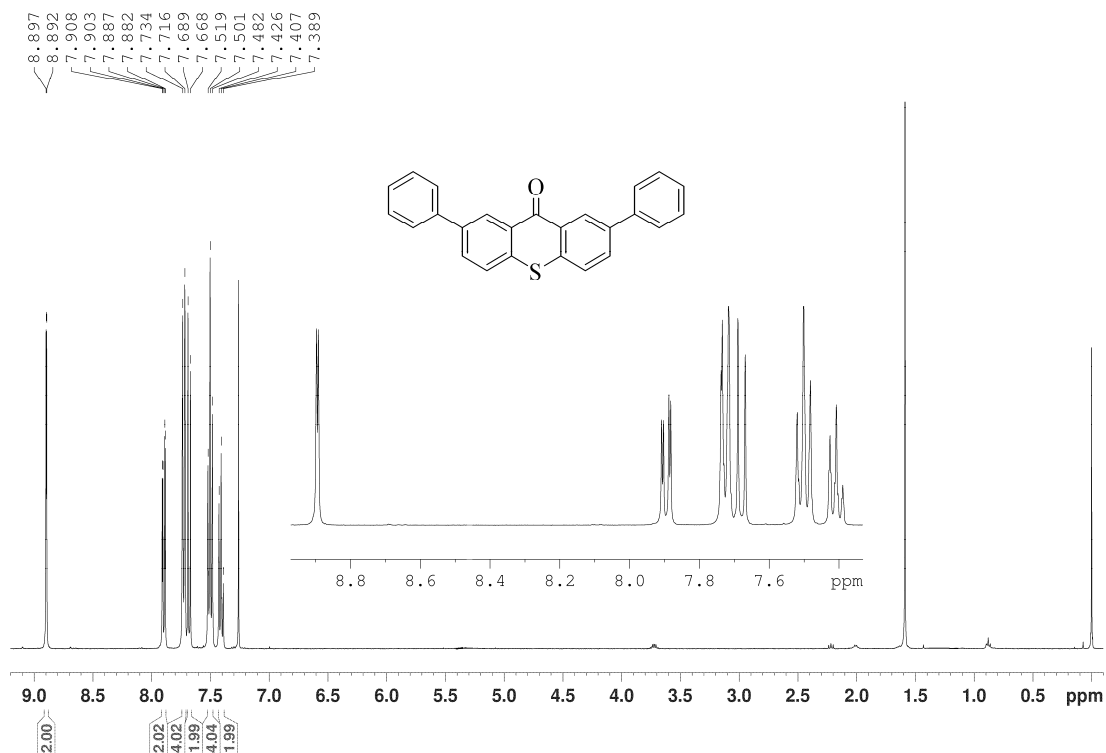

**Figure S3.**  $^1\text{H}$  NMR (400 MHz,  $\text{CDCl}_3$ ) spectrum of compound **DP-TXO**.

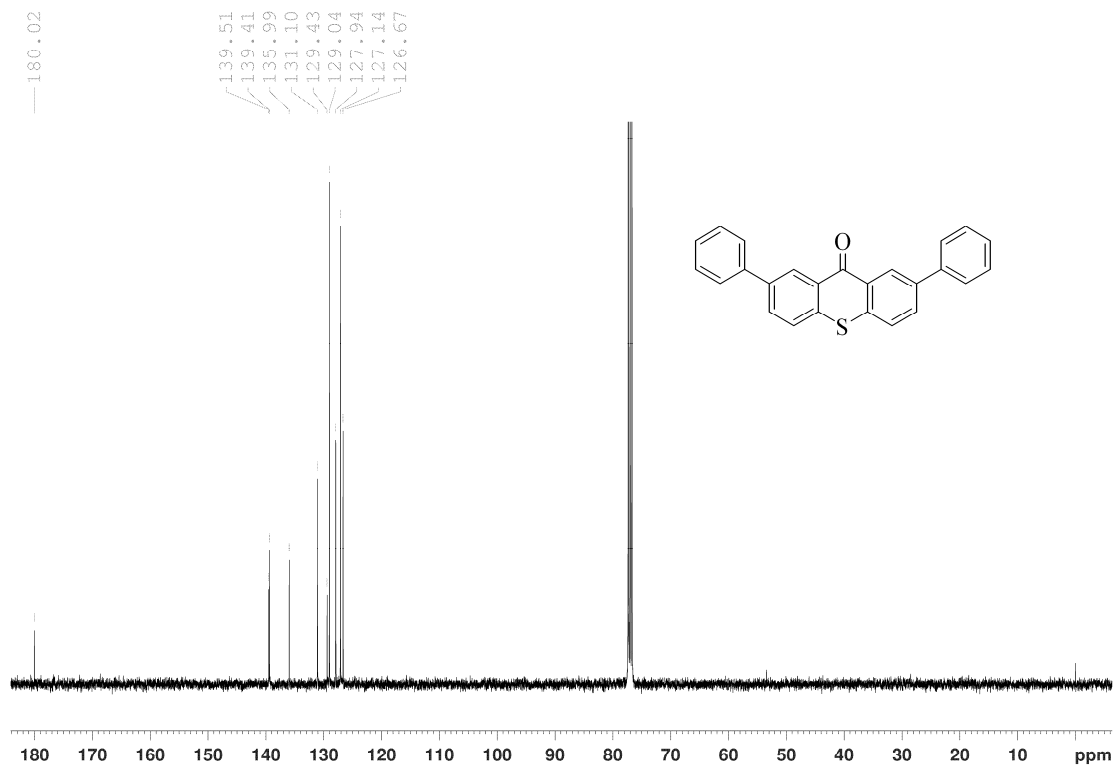

**Figure S4.** <sup>13</sup>C NMR (100 MHz, CDCl<sub>3</sub>) spectrum of compound **DP-TXO**.

Monoisotopic Mass, Even Electron Ions

217 formula(e) evaluated with 188 results within limits (up to 1 closest results for each mass)

Elements Used:

C: 0-80 H: 0-160 O: 0-16 S: 0-3

ECUST institute of Fine Chem

20-Oct-2011

19:56:46

1: TOF MS ES+  
7.66e+003

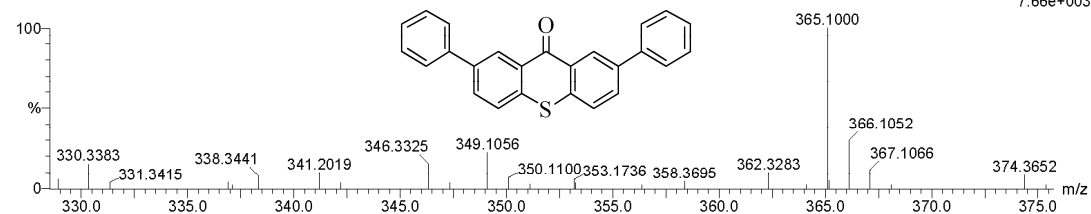

Minimum:

Maximum: 500.0 50.0 -1.5 100.0

| Mass     | Calc. Mass | mDa | PPM | DBE  | i-FIT | i-FIT (Norm) | Formula                             |
|----------|------------|-----|-----|------|-------|--------------|-------------------------------------|
| 365.1000 | 365.1000   | 0.0 | 0.0 | 17.5 | 21.4  | 0.0          | C <sub>25</sub> H <sub>17</sub> O S |

**Figure S5.** ESI-MS spectrum of compound **DP-TXO**.

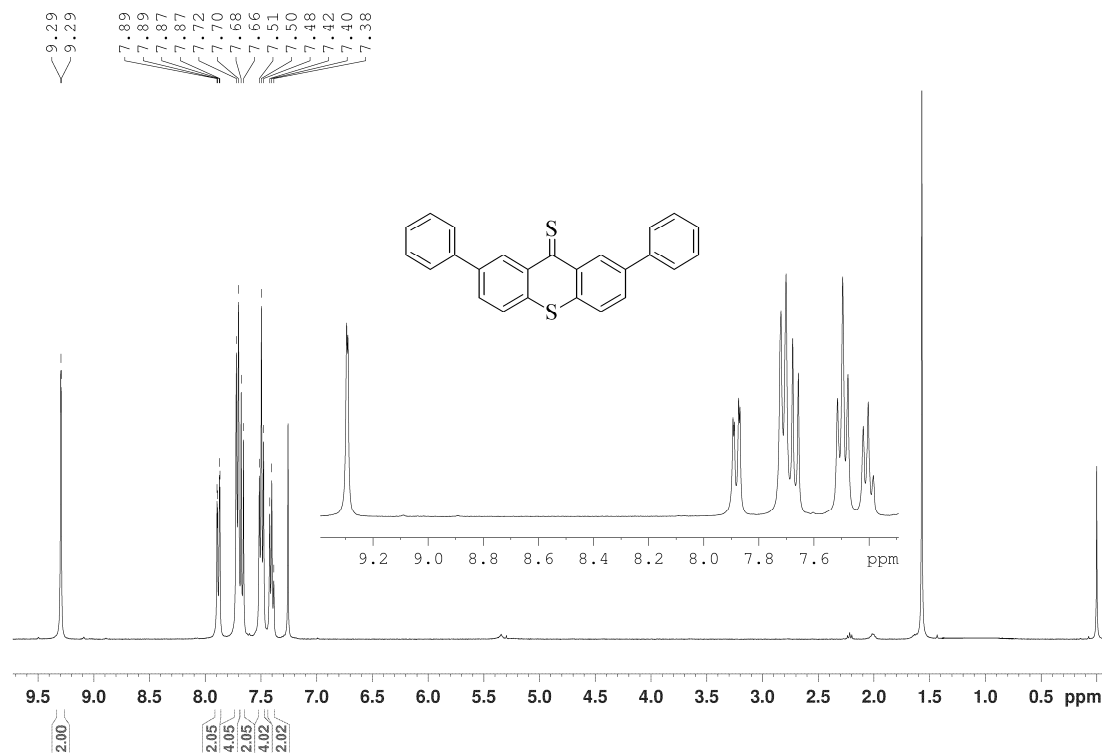

**Figure S6.** <sup>1</sup>H NMR (400 MHz, CDCl<sub>3</sub>) spectrum of compound **DP-TXT**.

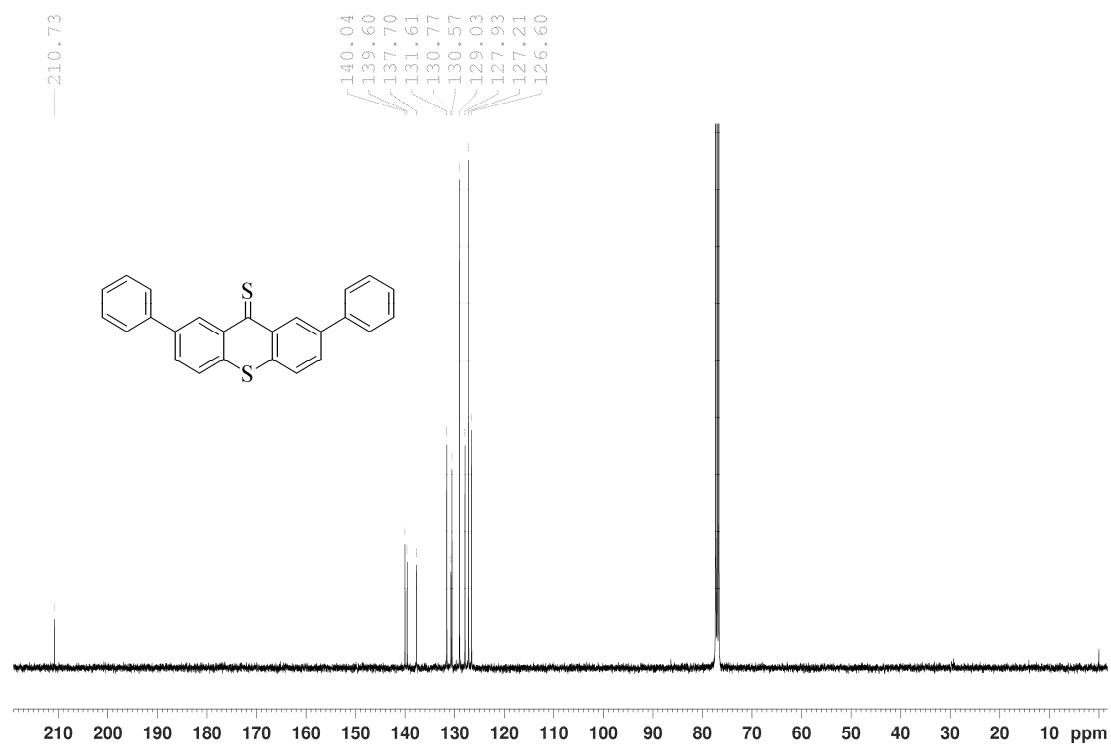

**Figure S7.** <sup>13</sup>C NMR (100 MHz, CDCl<sub>3</sub>) spectrum of compound **DP-TXT**.

Monoisotopic Mass, Even Electron Ions

2 formula(e) evaluated with 1 results within limits (up to 1 closest results for each mass)

Elements Used:

C: 0-25 H: 0-20 S: 0-2

ECUST institute of Fine Chem

26-Oct-2011

21:57:55

1: TOF MS ES+

1.61e+003

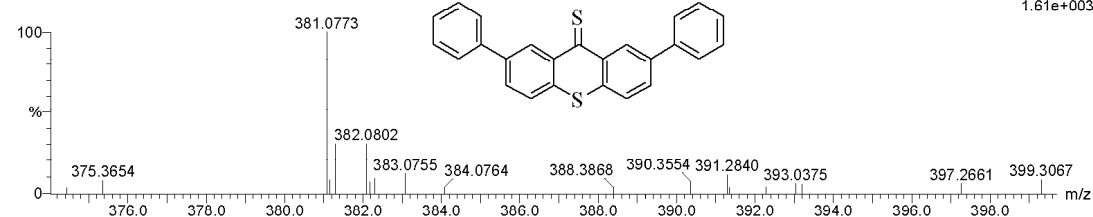

| Minimum: |            |      |       | -1.5 |       |              |            |
|----------|------------|------|-------|------|-------|--------------|------------|
| Maximum: | 50.0       | 50.0 | 100.0 |      |       |              |            |
| Mass     | Calc. Mass | mDa  | PPM   | DBE  | i-FIT | i-FIT (Norm) | Formula    |
| 381.0773 | 381.0772   | 0.1  | 0.3   | 17.5 | 47.6  | 0.0          | C25 H17 S2 |

**Figure S8.** ESI-MS spectrum of compound **DP-TXT**.

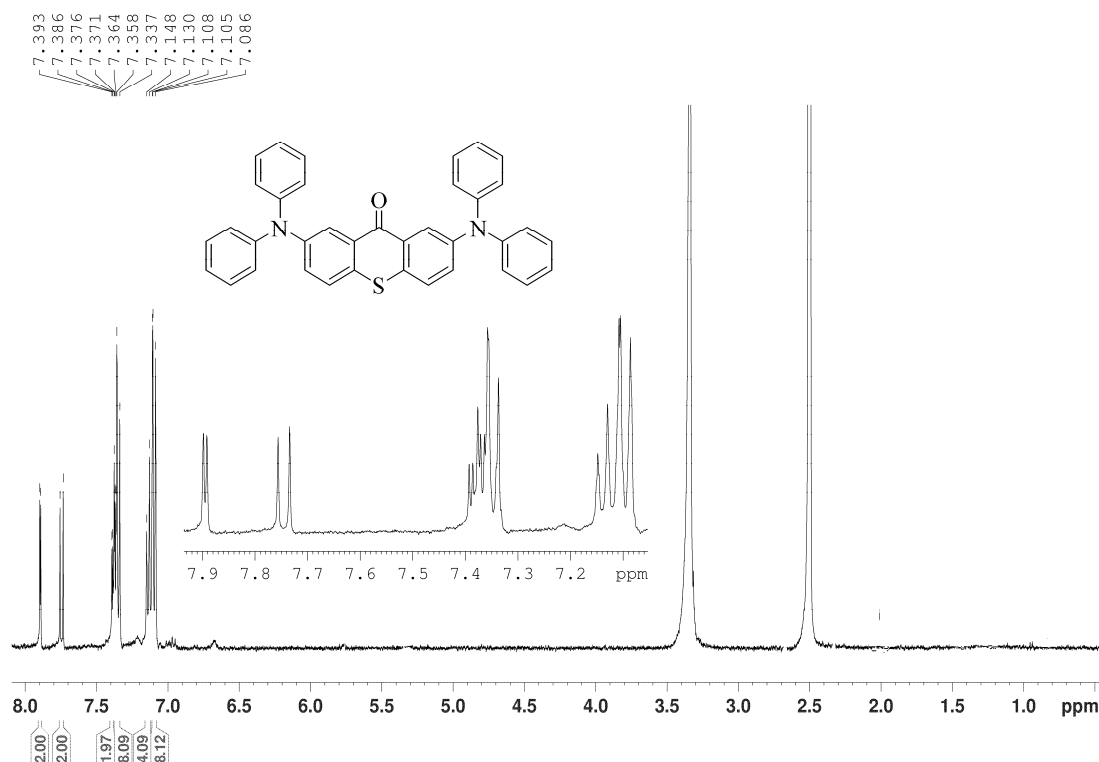

**Figure S9.**  $^1\text{H}$  NMR (400 MHz,  $\text{DMSO-}d_6$ ) spectrum of compound **BDPA-TXO**.

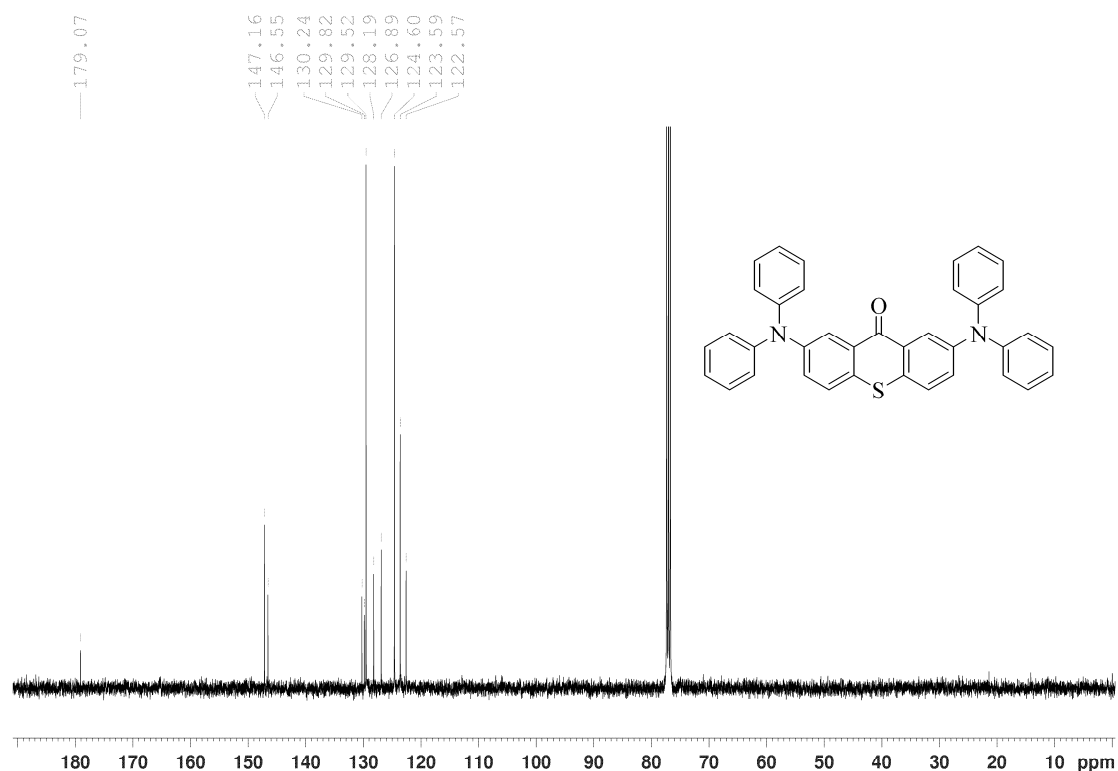

**Figure S10.**  $^{13}\text{C}$  NMR (100 MHz,  $\text{CDCl}_3$ ) spectrum of compound **BDPA-TXO**.

Monoisotopic Mass, Even Electron Ions

72 formula(e) evaluated with 8 results within limits (up to 1 closest results for each mass)

Elements Used:

C: 0-40 H: 0-30 N: 0-5 O: 0-1 S: 0-2

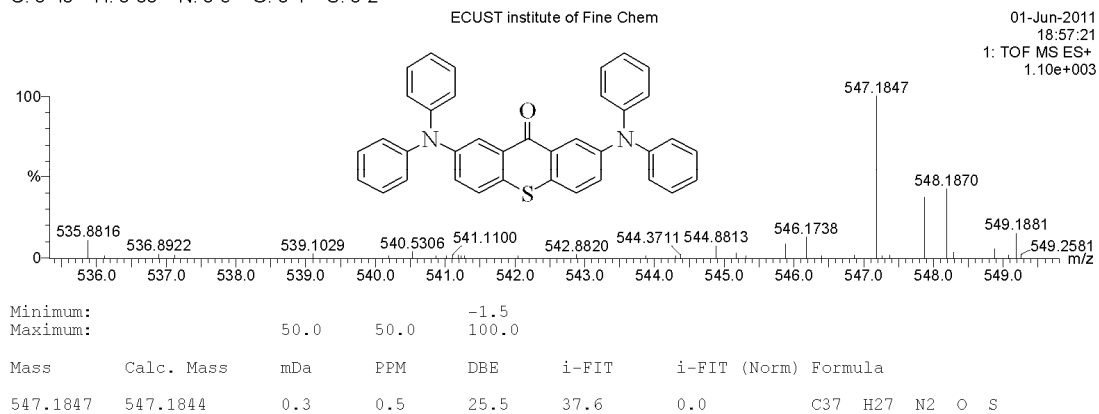

**Figure S11.** ESI-MS spectrum of compound **BDPA-TXO**.

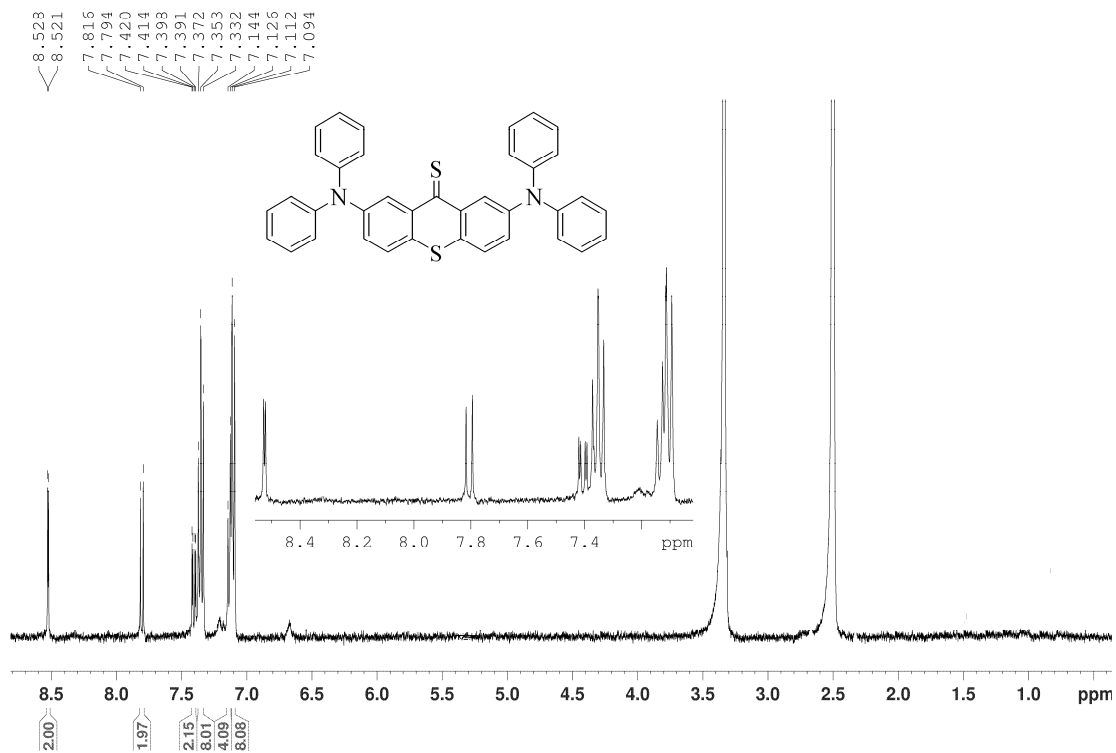

**Figure S12.**  $^1\text{H}$  NMR (400 MHz,  $\text{DMSO-}d_6$ ) spectrum of compound **BDPA-TXT**.

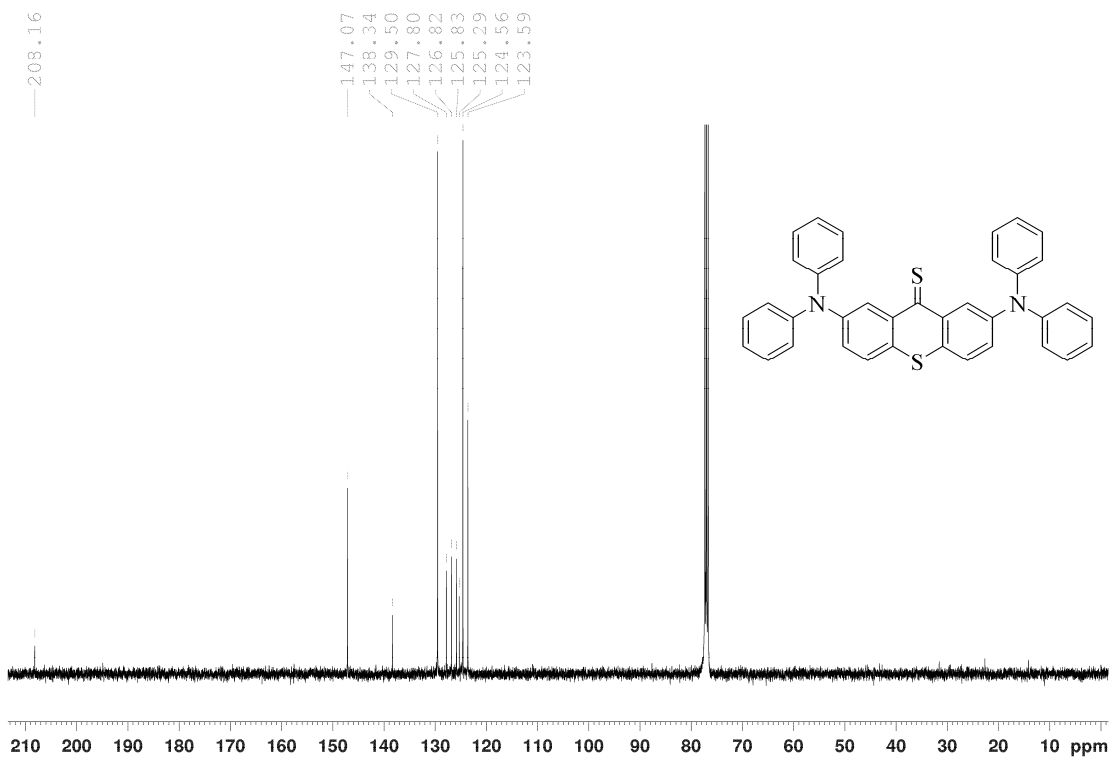

**Figure S13.**  $^{13}\text{C}$  NMR (100 MHz,  $\text{CDCl}_3$ ) spectrum of compound **BDPA-TXT**.

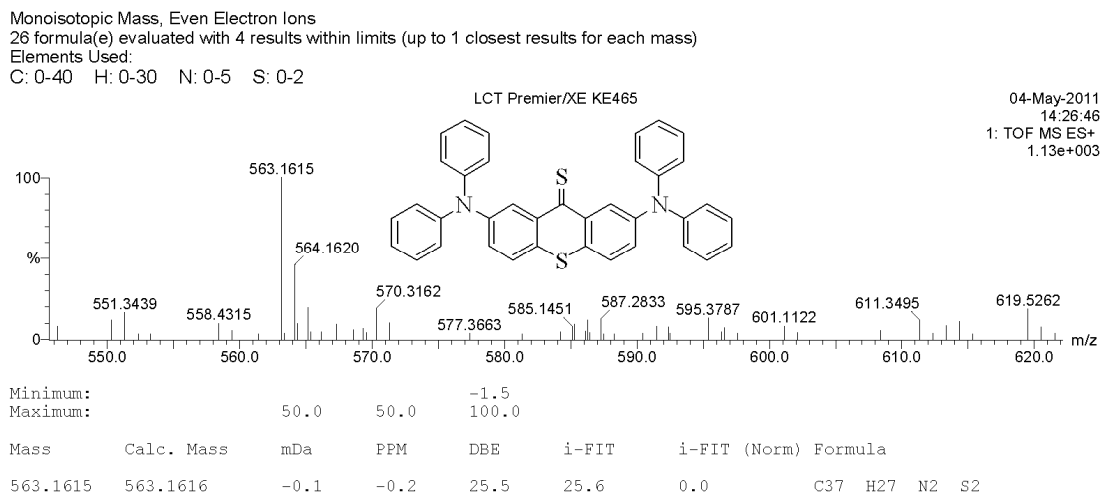

**Figure S14.** ESI-MS spectrum of compound **BDPA-TXT**.

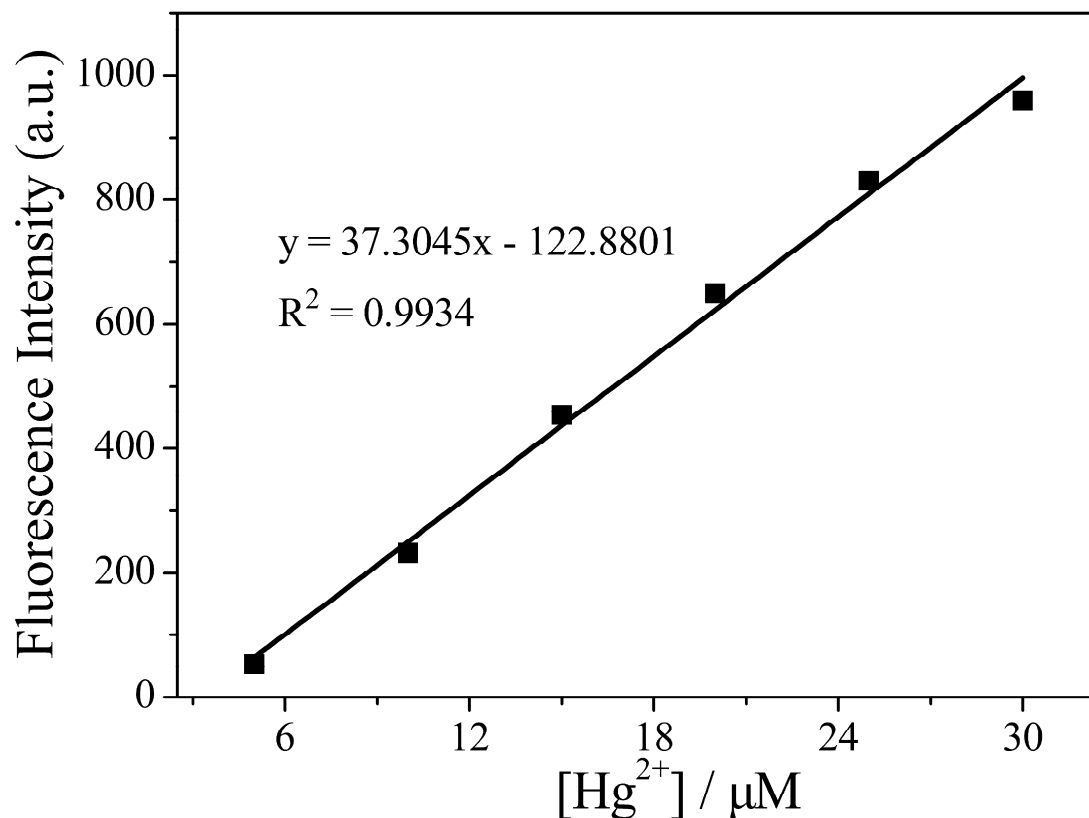

**Figure S15.** A plot of fluorescence intensity change of **DP-TXT** (10.0  $\mu\text{M}$ ) against varied concentrations of  $\text{Hg}^{2+}$  (5.0–30.0  $\mu\text{M}$ ) in  $\text{CH}_3\text{CN}-\text{H}_2\text{O}$  (5:5, v/v) ( $\lambda_{\text{ex}} = 309 \text{ nm}$ , slit: 5 nm/5 nm, PMT Volts: 610.).  $R^2 = 0.9934$ ,  $k = 3.7 \times 10^7 \text{ au/M}$ . The Standard deviation ( $\sigma = 0.26$ ) was obtained by fluorescence responses (10-times of consecutive scanning on the Varian Cary Eclipse Fluorescence Spectrophotometer). Therefore, the detection limit was calculated by the formula ( $3\sigma/k$ ) and gave a result 21 nM.



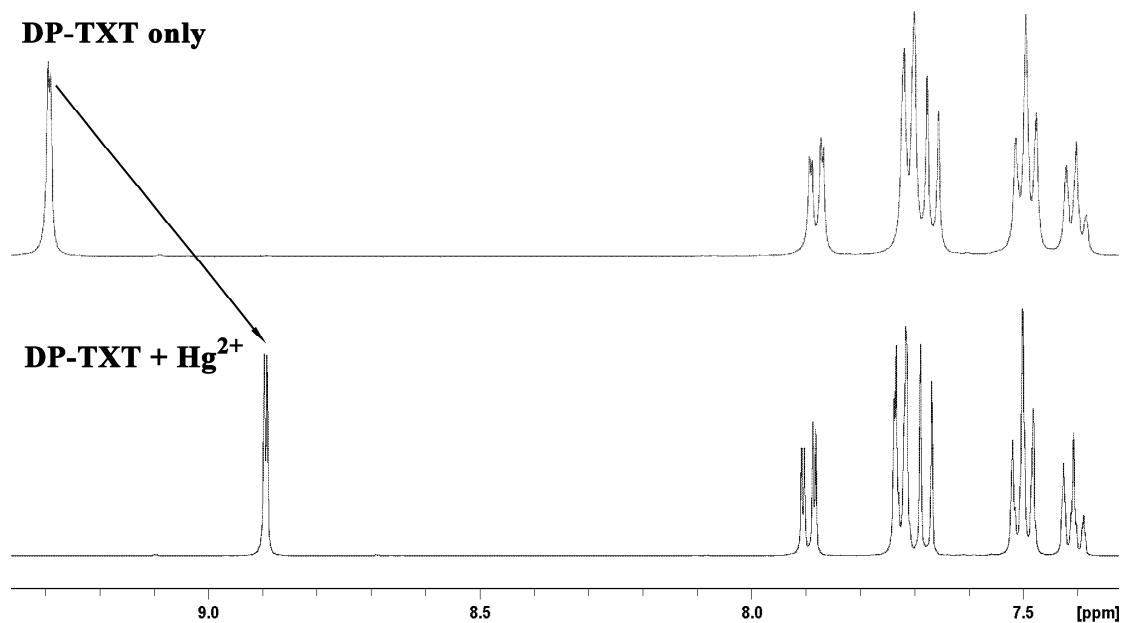

**Figure S16.** Partial <sup>1</sup>H NMR spectrum (400 MHz, CDCl<sub>3</sub>) of chemodosimeter DP-TXT before and after addition of excessive Hg<sup>2+</sup>

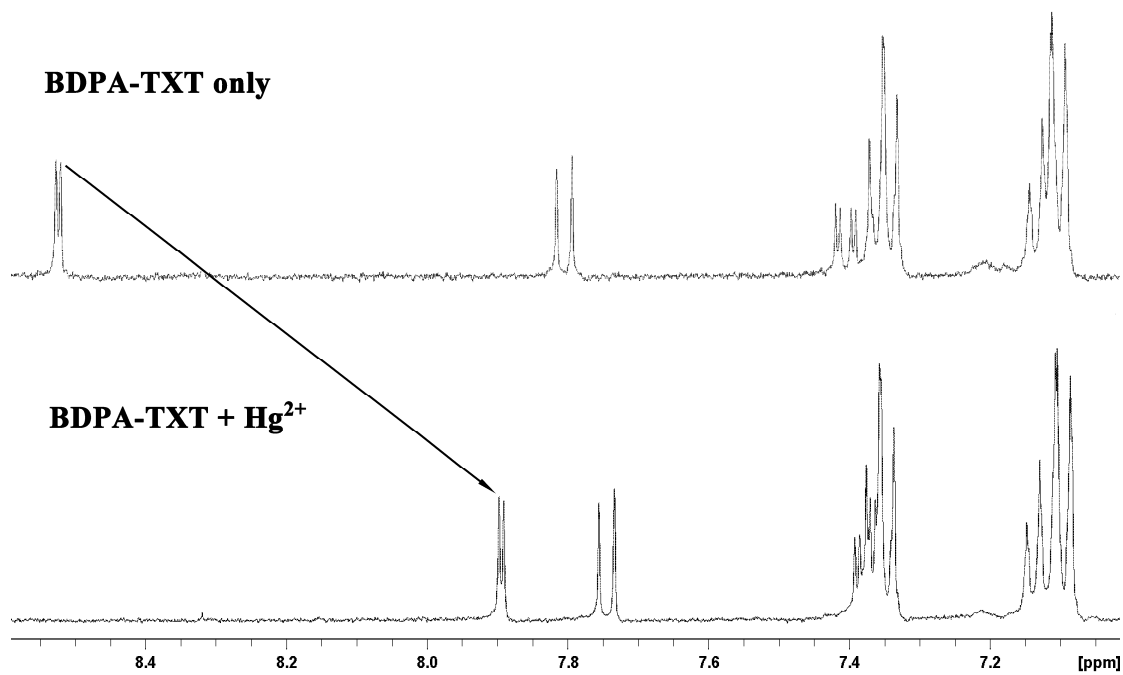

**Figure S17.** Partial <sup>1</sup>H NMR spectrum (400 MHz, DMSO-*d*<sub>6</sub>) of chemodosimeter BDPA-TXT before and after addition of excessive Hg<sup>2+</sup>

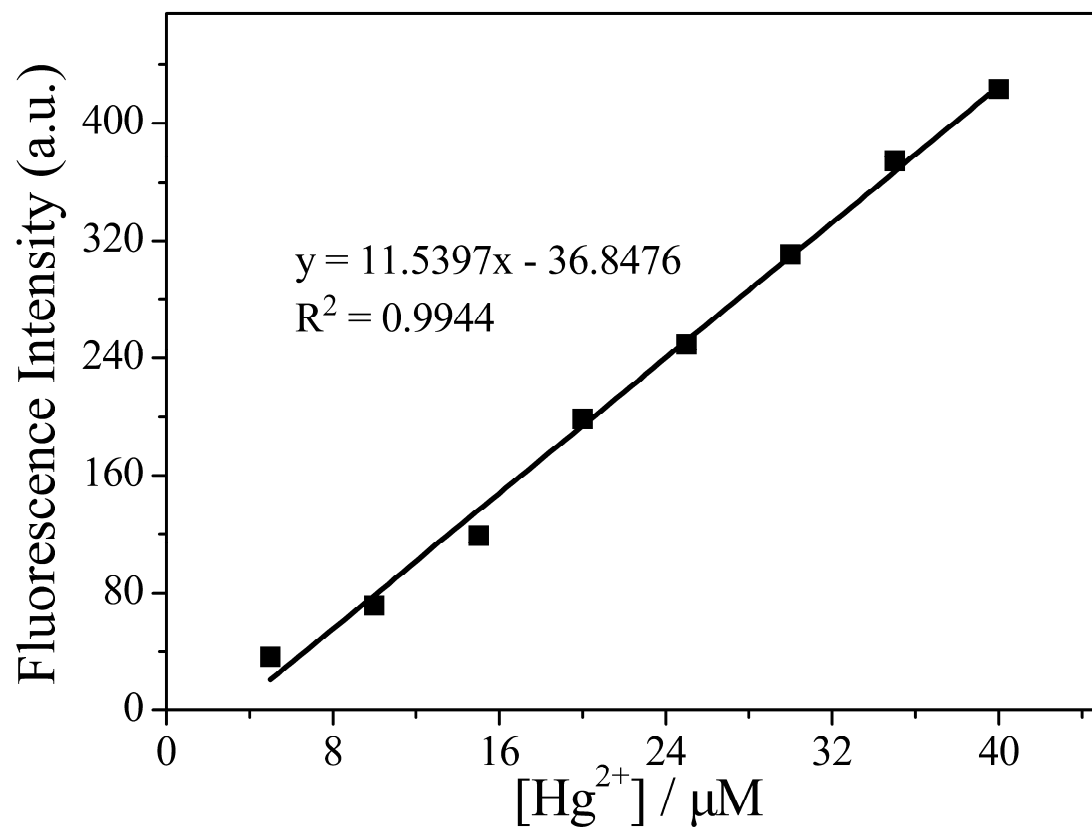

**Figure S18.** A plot of fluorescence intensity change of **BDPA-TXT** (10.0 μM) against varied concentrations of  $\text{Hg}^{2+}$  (5.0–40.0 μM) in DMSO–H<sub>2</sub>O (9:1, v/v) ( $\lambda_{\text{ex}} = 357$  nm, slit: 5 nm/5 nm, PMT Volts: 800.).  $R^2 = 0.9944$ ,  $k = 1.2 \times 10^7$  au/M. The Standard deviation ( $\sigma = 0.30$ ) was obtained by fluorescence responses (10-times of consecutive scanning on the Varian Cary Eclipse Fluorescence Spectrophotometer). Therefore, the detection limit was calculated by the formula ( $3\sigma/k$ ) and gave a result 75 nM.

Monoisotopic Mass, Even Electron Ions  
26 formula(e) evaluated with 4 results within limits (up to 1 closest results for each mass)  
Elements Used:  
C: 0-40 H: 0-30 N: 0-5 S: 0-2

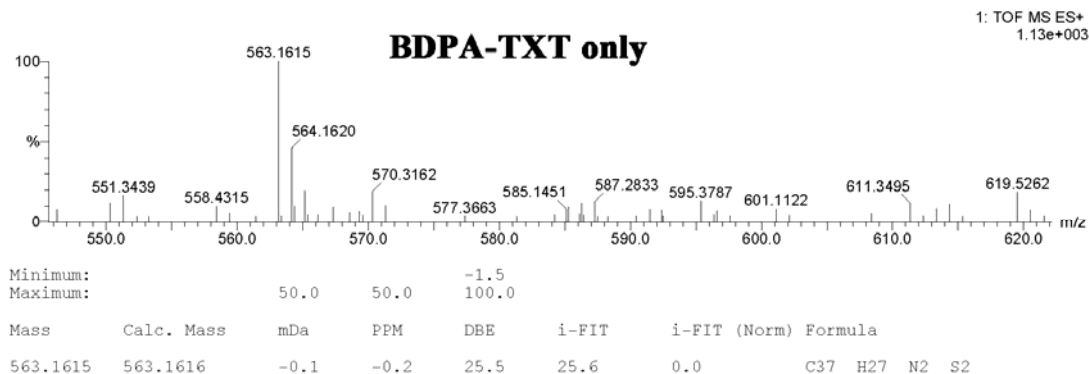

Monoisotopic Mass, Even Electron Ions  
72 formula(e) evaluated with 8 results within limits (up to 1 closest results for each mass)  
Elements Used:  
C: 0-40 H: 0-30 N: 0-5 O: 0-1 S: 0-2

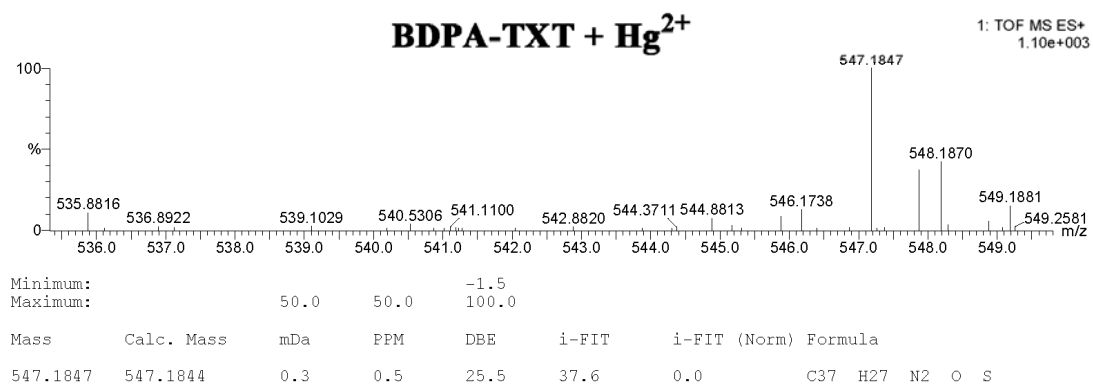

**Figure S19.** HRMS (ESI) spectra of compound **BDPA-TXT** in the absence and in the presence of Hg<sup>2+</sup>.

Monoisotopic Mass, Even Electron Ions  
 2 formula(e) evaluated with 1 results within limits (up to 1 closest results for each mass)  
 Elements Used:  
 C: 0-25 H: 0-20 S: 0-2

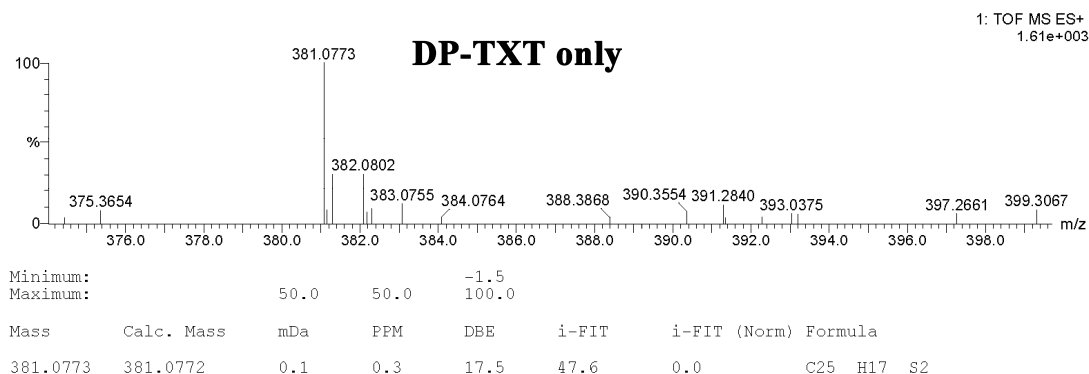

Monoisotopic Mass, Even Electron Ions  
 217 formula(e) evaluated with 188 results within limits (up to 1 closest results for each mass)  
 Elements Used:  
 C: 0-80 H: 0-160 O: 0-16 S: 0-3

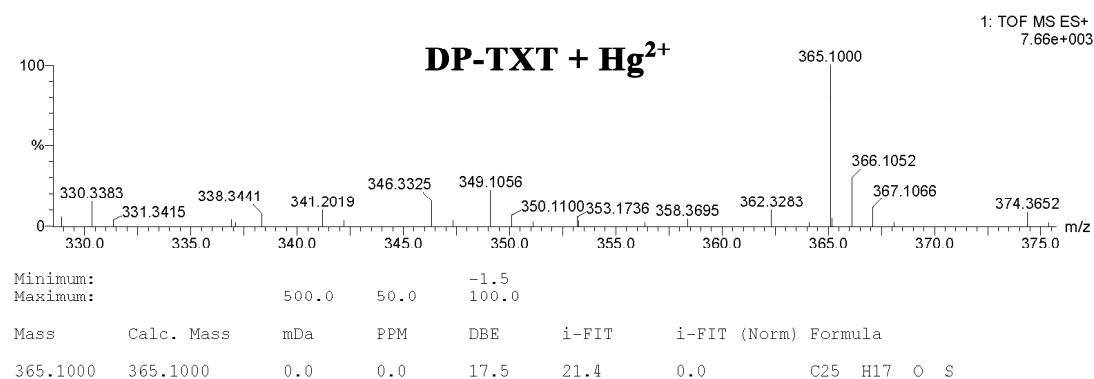

**Figure S20.** HRMS (ESI) spectra of compound **DP-TXT** in the absence and in the presence of Hg<sup>2+</sup>.

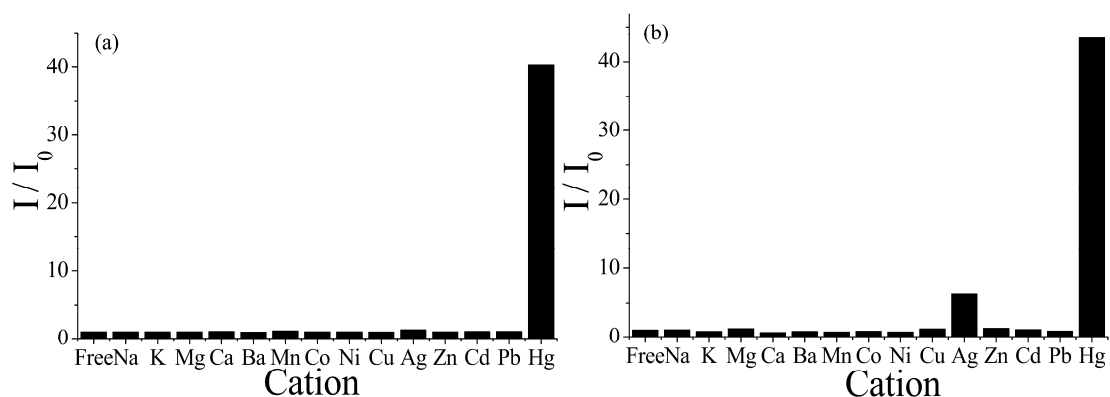

**Figure S21.** (a) Emission ratiometric response of **DP-TXT** to various metal ions. [DP-TXT] =  $1.0 \times 10^{-5}$  M, [Hg<sup>2+</sup>] =  $3.0 \times 10^{-5}$  M, [M<sup>n+</sup>] =  $1.0 \times 10^{-4}$  M. (b) Emission ratiometric response of **BDPA-TXT** to various metal ions. [BDPA-TXT] =  $1.0 \times 10^{-5}$  M, [Hg<sup>2+</sup>] =  $4.0 \times 10^{-5}$  M, [M<sup>n+</sup>] =  $1.0 \times 10^{-4}$  M.
